# Supplementary material
Source: publisher site journal article supplement (https://www.dovepress.com/article/331090)
Supplement: Supplementary file 1 [file get_supplementary_file.php]

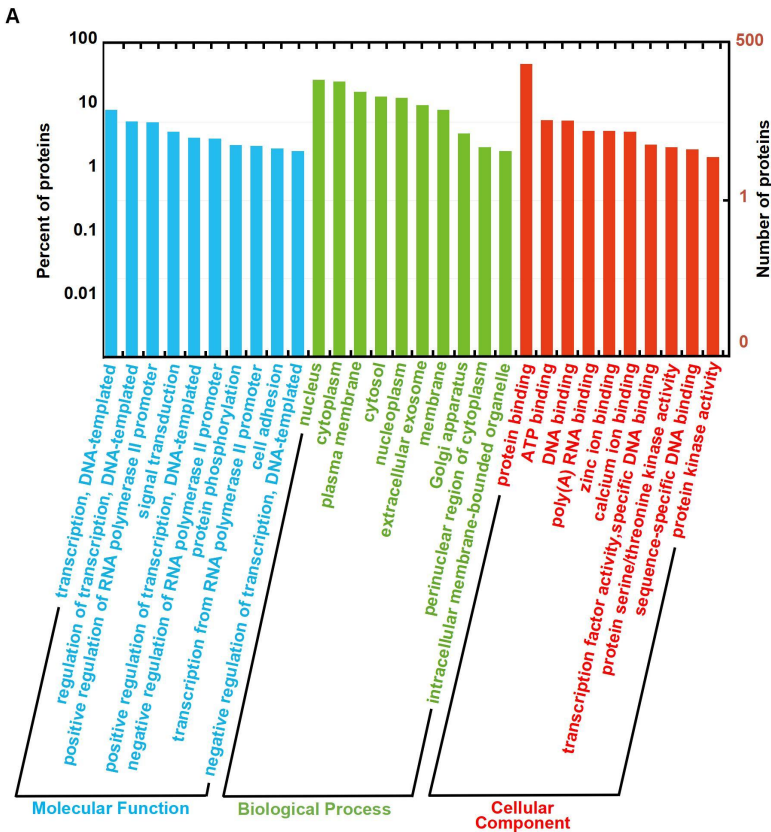

Supplementary Figure S1

Top 10 function annotation and pathway analysis for target gene series.

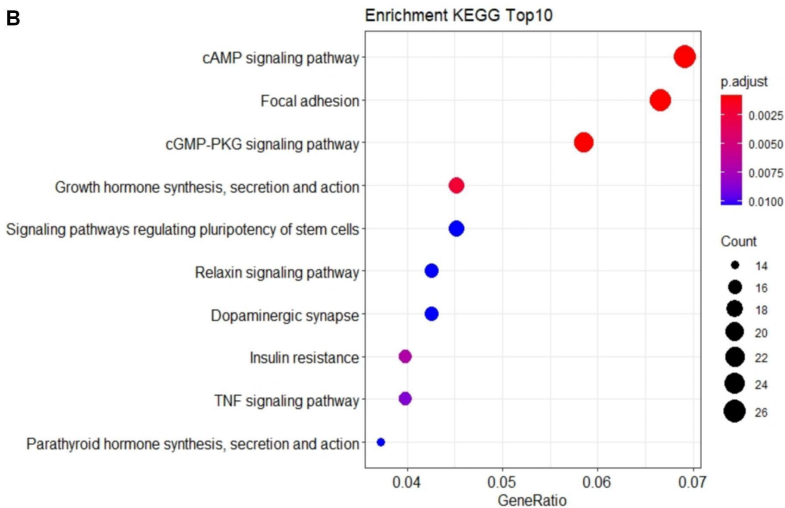

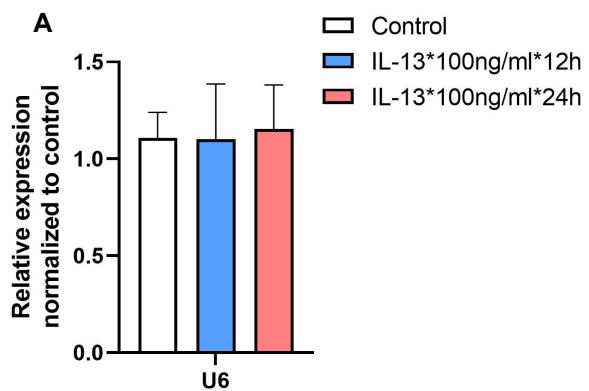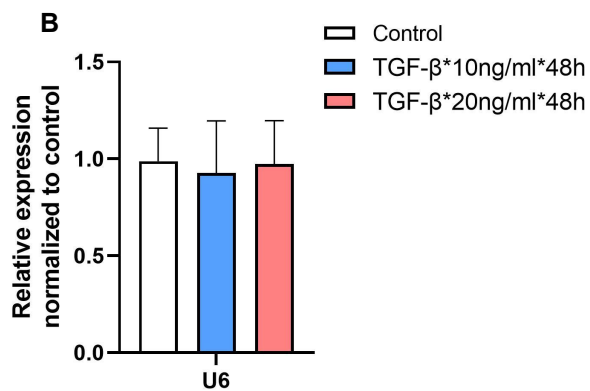

**Supplementary Figure S2** TGF- $\beta$ /IL-13 treatment did not change the expression of U6

**Supplementary Table S1. Demographic and clinical characteristics of asthmatic patients and healthy subjects**

|                                                    | Asthmatic patients (n=10) | Healthy subjects (n=10) |
|----------------------------------------------------|---------------------------|-------------------------|
| Sex                                                |                           |                         |
| Male                                               | 5(50%)                    | 5(50%)                  |
| Female                                             | 5(50%)                    | 5(50%)                  |
| Age, years                                         | 40.5(25.8-48.5)           | 37.0(24.6-45.8)         |
| Current smoker                                     | 0(0%)                     | 0(0%)                   |
| Cough                                              | 8(80%)                    | 0(0%)                   |
| Sputum production                                  | 1(10%)                    | 0(0%)                   |
| Chest tightness                                    | 5(50%)                    | 0(0%)                   |
| White blood cell count,<br>× 10 <sup>9</sup> per L | 6.9(3.6-11.1)             | 5.8(3.9-8.7)            |
| Neutrophil count,<br>× 10 <sup>9</sup> per L       | 3.8(3.1-6.1)              | 3.6(2.4-5.7)            |
| Eosinophils count,<br>× 10 <sup>9</sup> per L      | 0.48(0.33-1.82)           | 0.13(0.02-0.29)         |

Data are presented as averages(IQR) or n (n/N%), where N is the total number of corresponding patients.

Healthy subjects

Asthmatics

|                         |        |        |        |        |        |        |        |        |        |        |        |        |        |        |        |        |        |        |        |       |       |       |       |       |       |       |       |       |       |       |       |       |       |       |       |       |       |       |
|-------------------------|--------|--------|--------|--------|--------|--------|--------|--------|--------|--------|--------|--------|--------|--------|--------|--------|--------|--------|--------|-------|-------|-------|-------|-------|-------|-------|-------|-------|-------|-------|-------|-------|-------|-------|-------|-------|-------|-------|
| hsa-mi<br>R-92b-1<br>3p | 1.2453 | 1.5551 | 1.9708 | 1.5592 | 2.7917 | 0.7259 | 0.5114 | 1.5282 | 2.7648 | 0.5036 | 0.3993 | 0.3741 | 0.7779 | 0.6509 | 0.6943 | 0.6543 | 0.4700 | 0.5108 | 0.6701 | 22457 | 10821 | 06584 | 81231 | 96032 | 67569 | 91147 | 37161 | 91654 | 52479 | 61665 | 93447 | 918   | 23904 | 38433 | 01284 | 9539  | 91807 | 94468 |
| hsa-mi<br>R-99a-1<br>5p | 0.9532 | 0.0922 | 0.2316 | 0.8002 | 0.2722 | 0.5302 | 0.6986 | 0.1909 | 0.7585 | 0.6159 | 0.0156 | 0.4558 | 0.0512 | 0.7609 | 0.3302 | 0.8648 | 0.7371 | 1.1256 | 0.8742 | 71466 | 21571 | 99663 | 60037 | 29443 | 11731 | 29086 | 63647 | 10252 | 81124 | 78248 | 7411  | 67088 | 0408  | 11195 | 44527 | 71239 | 09553 | 64489 |
| hsa-mi<br>R-106<br>b-5p | 0.4002 | 1.6777 | 0.6316 | 0.6922 | 0.2722 | 0.7302 | 0.9086 | 1.1909 | 1.0085 | 0.8159 | 1.7156 | 1.4158 | 0.4512 | 0.4609 | 0.5602 | 0.8648 | 0.7371 | 2.1256 | 0.4513 | 60037 | 25532 | 99663 | 21571 | 29443 | 11731 | 29086 | 63647 | 10252 | 81124 | 78248 | 7411  | 67088 | 0408  | 11195 | 44527 | 71239 | 09553 | 21982 |
| hsa-mi<br>R-124<br>6    | 0.9260 | 0.6097 | 0.9148 | 0.7182 | 1.1060 | 0.8772 | 0.6661 | 1.1618 | 1.0846 | 3.5119 | 6.6151 | 8.2978 | 16.077 | 18.049 | 19.892 | 4.0937 | 3.2390 | 7.5061 | 6.4842 | 47035 | 23922 | 85102 | 01988 | 26565 | 96592 | 68247 | 23856 | 01065 | 44957 | 31599 | 90251 | 10102 | 05162 | 09239 | 24288 | 67167 | 07367 | 31512 |
| hsa-mi<br>R-203<br>a-3p | 0.5855 | 1.5866 | 0.5994 | 0.8626 | 0.5292 | 0.3678 | 0.5596 | 0.7662 | 0.6207 | 4.4317 | 5.6925 | 3.7308 | 12.605 | 4.9599 | 16.004 | 4.3101 | 3.4628 | 6.6475 | 4.8654 | 92611 | 15069 | 29276 | 47405 | 17965 | 02654 | 63642 | 67257 | 02796 | 10762 | 93487 | 45784 | 8005  | 59394 | 23841 | 94393 | 47786 | 7966  | 25877 |
| hsa-mi<br>R-197-1<br>3p | 0.1002 | 1.0977 | 0.2316 | 0.4093 | 0.2722 | 0.2202 | 0.2086 | 0.1909 | 0.1085 | 0.0159 | 0.0156 | 0.0158 | 0.0512 | 0.0609 | 0.1802 | 0.8648 | 0.8871 | 1.1256 | 0.0482 | 60037 | 25532 | 99663 | 02093 | 29443 | 11731 | 29086 | 63647 | 10252 | 81124 | 78248 | 7411  | 67088 | 0408  | 11195 | 44527 | 71239 | 09553 | 42354 |
| hsa-mi<br>R-124-1<br>5p | 1.8986 | 1.1121 | 5.8135 | 2.3999 | 6.0745 | 3.0986 | 6.8743 | 4.2234 | 8.3935 | 3.1791 | 7.3716 | 5.7301 | 3.5593 | 6.2845 | 8.1001 | 1.6324 | 2.1944 | 1.0185 | 5.3817 | 32742 | 61511 | 02648 | 88817 | 03022 | 56281 | 53685 | 78625 | 49452 | 77873 | 98399 | 63622 | 4214  | 8455  | 0307  | 38361 | 72991 | 21508 | 58769 |
| hsa-mi<br>R-22-5<br>p   | 0.0940 | 0.7972 | 0.0624 | 0.0411 | 0.0498 | 0.1596 | 0.4896 | 0.0545 | 0.0143 | 0.4296 | 0.1475 | 0.8123 | 0.0989 | 0.0693 | 0.1101 | 0.0910 | 0.0231 | 0.0339 | 0.3741 | 70753 | 00924 | 54491 | 76478 | 13687 | 53352 | 28214 | 71282 | 94901 | 85255 | 36623 | 96592 | 30608 | 74118 | 32879 | 9773  | 03589 | 99373 | 28754 |
| hsa-mi<br>R-21-5<br>p   | 0.8532 | 0.0287 | 0.0241 | 0.0107 | 0.0160 | 0.6947 | 0.4381 | 0.3751 | 0.0177 | 0.0025 | 0.0009 | 0.0008 | 0.0094 | 0.0075 | 0.0127 | 0.0070 | 0.0073 | 0.0078 | 0.0064 | 10959 | 16061 | 33892 | 15247 | 24619 | 96781 | 26239 | 69059 | 93573 | 14534 | 74017 | 42299 | 09528 | 20509 | 30155 | 46021 | 12131 | 18076 | 18354 |
| hsa-mi<br>R-19b-1<br>3p | 0.2099 | 0.2981 | 0.0253 | 0.0247 | 0.0207 | 0.2439 | 0.2154 | 0.2149 | 0.0243 | 0.0004 | 0.0004 | 0.0006 | 0.0097 | 0.0159 | 0.0091 | 0.0058 | 0.0054 | 0.0072 | 0.0058 | 76214 | 22645 | 37545 | 59937 | 43974 | 50346 | 62651 | 53499 | 32494 | 98599 | 70634 | 37985 | 65552 | 04073 | 52596 | 54574 | 87088 | 45334 | 95423 |
| hsa-mi<br>R-193-1<br>5p | 1.1398 | 0.6707 | 3.7185 | 2.9526 | 2.2123 | 0.6130 | 2.8896 | 0.2760 | 5.1144 | 1.6288 | 1.3712 | 0.9691 | 3.9796 | 3.9509 | 3.1525 | 0.6693 | 0.8984 | 1.1857 | 2.4340 | 60032 | 66509 | 28111 | 57257 | 37011 | 73686 | 01353 | 92565 | 20153 | 45652 | 54005 | 28213 | 50373 | 81092 | 92071 | 25192 | 8764  | 86782 | 05669 |

**Table S2:** Original qPCR data for Figure 4
